# Supplementary material for: Sensing of n-butanol vapours using an oxygen vacancy-enriched Zn2SnO4–SnO2 hybrid-composite
Source: Royal Society of Chemistry journal article supplement (doi:10.1039/d4cp04070h), 2024-12-30
Supplement: d4cp04070h1.pdf [file d4cp04070h1.pdf]

## Sensing of n-Butanol Vapours with Oxygen Vacancy-Enriched Zn<sub>2</sub>SnO<sub>4</sub>-SnO<sub>2</sub> Hybrid-composite

Reshmi Thekke Parayil<sup>1,2#</sup>, Snehangshu Paine,<sup>3#</sup> K. Mukherjee,<sup>3\*</sup> D. Tyagi,<sup>4</sup> Manoj Mohapatra,<sup>1,2</sup>  
Santosh K. Gupta,<sup>1,2\*</sup>

<sup>1</sup>Radiochemistry Division, Bhabha Atomic Research Centre, Trombay, Mumbai-400085, India

<sup>2</sup>Homi Bhabha National Institute, Anushaktinagar, Mumbai – 400094, India

<sup>3</sup>Department of Chemistry, Pandit Deendayal Energy University, Gandhinagar-382426, Gujarat, India

<sup>4</sup>Chemistry Division, Bhabha Atomic Research Centre, Trombay, Mumbai-400085, India

# RTP and SP contributed equally to this work

\*To whom correspondence should be addressed. Electronic mail:  
[kalisadhamm@yahoo.com](mailto:kalisadhamm@yahoo.com)(KM) [santoshg@barc.gov.in](mailto:santoshg@barc.gov.in) (SKG)

### Scheme S1: Detailed derivation of the fitting equation of the conductance transients

As discussed earlier, when the sensor is exposed to butanol, it oxidised by the pre-adsorbed oxygen species (Eqn. 3) forming RO<sub>ad</sub>. Assuming the monolayer adsorption of ethanol on the sensor surface at constant temperature, T, the conductance transients can be modelled with the Langmuir- Hinshelwood adsorption mechanism. Since the Eqn. 3 is a rate-limiting step, the rate of the RO<sub>ad</sub> formation can be written as:

$$\frac{d[RO_{ad}]}{dt} = k_a[R_g][O_{ad}^-] - k_d[RO_{ad}] \quad (i)$$

If it is assumed that at time, t, the fraction of the surface is occupied by chemisorbed oxidised vapours (RO<sub>ad</sub>) is  $\theta$ . The remaining unoccupied sites,  $(1 - \theta)$ , are filled by the excess oxyanion ( $O_{ad}^-$ ) and concentration of the injected reducing gas such as acetone and ethanol is C<sub>g</sub>, we may write from Eqn. (i):

$$\frac{d\theta}{dt} = k_a(1 - \theta)Cg - k_d\theta \quad (ii)$$

Where,  $k_a$  and  $k_d$  represents the adsorption and desorption constants.

$$k_a = \frac{SN_0K_0}{(2\pi MRT)^{1/2}} \exp\left(-\frac{E_a}{RT}\right) \quad (iii)$$

where, S denotes the surface area of the sensor where VOC adsorbed,  $K_0$  is the condensation coefficient,  $E_a$  represents the activation energy for adsorption,  $N_0$  and R are the Avogadro's number, and universal gas constant respectively.

Eqn. (ii) can be rearranged as;

$$\frac{d\theta}{dt} = k_a Cg - (k_a Cg - K_d)\theta \quad (iv)$$

Assuming  $(k_a Cg - K_d) = k_1$ , Eqn. (iv) can be rewrite as;

$$\frac{d\theta}{dt} = k_a Cg - k_1\theta \quad (v)$$

$$\frac{d\theta}{dt} + k_1\theta = k_a Cg \quad (vi)$$

Multiplying both side of Eqn. (vi) with the integrating factor,  $\exp(k_1t)$ ;

$$\exp(k_1t)\frac{d\theta}{dt} + k_1\theta\exp(k_1t) = k_a Cg \exp(k_1t) \quad (vii)$$

Left hand side is the derivative of;

$$\frac{d}{dt}(\theta \exp(k_1 t)) = k_a C g \exp(k_1 t) \quad (viii)$$

Integrate both side with respect to time, t;

$$\theta \exp(k_1 t) = k_a C g \int \exp(k_1 t) dt \quad (ix)$$

$$\theta \exp(k_1 t) = \frac{k_a C g}{k_1} \exp(k_1 t) + C \quad (x)$$

C is integration constant here. The Eqn. (x) can be rewrite as;

$$\theta = \frac{k_a C g}{k_1} + C \exp(-k_1 t) \quad (xi)$$

Assuming at t=0, the surface coverage,  $\theta = 0$ ;

$$C = -\frac{k_a C g}{k_1} \quad (xii)$$

Replacing C in Eqn. (xi) and rewriting it;

$$\theta = \frac{k_a C g}{k_1} (1 - \exp(-k_1 t)) \quad (xiii)$$

when  $t \rightarrow \infty$ ,  $\theta = \theta_0 = \frac{k_a C g}{k_1}$ , Eqn. (xiii) can be rewritten as,

$$\theta(t) = \theta_0 \{ 1 - \exp[-k_1 t] \} \quad (xiv)$$

When,

$$k_1 \sim \frac{1}{\tau_{1(res)}} = (k_a C g - k_d) \quad (xv)$$

$$\theta(t) = \theta_0 \left\{ 1 - \exp \left[ -\frac{t}{\tau_{1(res)}} \right] \right\} \quad (xvi)$$

In gas sensors, the conductance  $G(t)$  of the sensor is typically related to the surface coverage  $\theta(t)$  of adsorbed molecules. Assuming the linear functional dependency between  $\theta(t)$  and  $G(t)$  and the single adsorption site present on  $Zn_2SnO_4-SnO_2$  chemiresistor, the conductance variation of the response cycle  $G_A(t)$  can be written as:

$$G_A(t) = G_o + G_1 \left\{ 1 - \exp \left[ -\frac{t}{\tau_{1(res)}} \right] \right\} \quad (xvii)$$

where  $G_0$  is the base conductance of the sensing material,  $\tau_1$  is the response time constant.

In case of desorption cycle, the rate of change of surface coverage is written as;

$$\frac{d\theta}{dt} = -k_d \theta \quad (xviii)$$

Assuming at  $t=0$  (when desorption started), the surface coverage,  $\theta=\theta_0$  and at time  $t$ ,  $\theta$  would be  $\theta_d$  integrating the Eqn. (xviii) from both sides,

$$\int_{\theta_0}^{\theta_d} \frac{d\theta}{\theta} = -k_d \int_0^t dt \quad (xix)$$

$$\ln \left( \frac{\theta_d}{\theta_0} \right) = -k_d t \quad (xx)$$

Taking exponential both side;

$$\theta_d(t) = \theta_0 \exp(-k_d t) \quad (xxi)$$

The Eqn. (xxi) can be expressed as;

$$G_d(t) = G_o + G_2 \left\{ \exp \left[ -\frac{t}{\tau_{2(rec)}} \right] \right\} \quad (xxii)$$

Where  $k_d = \frac{1}{\tau_{2(rec)}}$ ,  $G_2$  is the change in conductance due to desorption and  $G_o$  is the baseline conductance.

From Eqn. (xvii) & Eqn. (xxii), we can write;

$$G(t) = G_o + G_1 \left\{ 1 - \exp \left[ -\frac{t}{\tau_{1(res)}} \right] \right\} + G_2 \left\{ \exp \left[ -\frac{t}{\tau_{2(rec)}} \right] \right\} \quad (xxiii)$$

Now assuming  $k_d \ll k_a C_g$ ,  $(k_a C_g - k_d) = k_1$  can be rewritten as,

$$k_1 = k_a C_g \quad (xiv)$$

From Eqn. (iii), we can deduce

$$k_a = A \exp \left( -\frac{E_a}{KT} \right) \quad (xv)$$

Where, A is pre-exponential constant and K is Boltzmann constant.

From Eqn. (xv), (xxiv) and (xxv), one can write

$$\tau_1 C_g = A^{-1} \exp \left( \frac{E_a}{KT} \right) \quad (xvi)$$

$$\tau_1 = \tau_0 \exp \left( \frac{E_a}{KT} \right) \quad (xxvii)$$

Where,  $\tau_0$  is a constant. At constant concentration of the ethanol and acetone ( $C_g = \text{constant}$ ),

taking logarithm of both side in Eqn. (xxvii)

$$\ln(\tau_1) = \text{const} + \frac{E_a}{RT} \quad (xxviii)$$

From the slope of the linear fitting of  $\ln(\tau_1)$  vs  $1/T$  plot using Eqn. (xxviii), the activation energy can be calculated.

**Table S1: The characteristics kinetic fitting parameters of conductance transients at different operating temperature and concentration of butanol**

| <b>Temp.</b>  | <b>Conc. (ppm)</b> | <b>G<sub>0</sub> (S)</b> | <b>G<sub>1</sub> (S)</b> | <b>G<sub>2</sub>(S)</b> | <b>τ<sub>1</sub> (s)</b> | <b>τ<sub>2</sub> (s)</b> |
|---------------|--------------------|--------------------------|--------------------------|-------------------------|--------------------------|--------------------------|
| <b>275 °C</b> | 100                | 5.102E-8                 | 1.884E-7                 | -                       | 30.46                    | -                        |
|               | 250                | 2.973E-8                 | 3.049E-7                 | -                       | 35.11                    | -                        |
|               | 500                | 4.202E-8                 | 3.666E-7                 | -                       | 47.98                    | -                        |
|               | 1000               | 1.026E-7                 | 6.065E-7                 | -                       | 80.26                    | -                        |
| <b>300 °C</b> | 100                | 8.462E-8                 | 3.614E-7                 | -                       | 74.68                    | -                        |
|               | 250                | 5.882E-8                 | 1.039E-6                 | -                       | 83.06                    | -                        |
|               | 500                | 1.942E-7                 | 1.438E-6                 | -                       | 95.15                    | -                        |
|               | 1000               | 7.534E-8                 | 2.129E-6                 | -                       | 139.47                   | -                        |
| <b>325 °C</b> | 100                | 4.158E-8                 | 7.882E-7                 | -3.391E-8               | 32.48                    | 13.60                    |
|               | 250                | 2.403E-7                 | 1.743E-6                 | -2.053E-7               | 39.67                    | 909.09                   |
|               | 500                | 2.623E-7                 | 3.043E-6                 | -1.241E-7               | 53.28                    | 192.30                   |
|               | 1000               | 2.454E-7                 | 5.669E-6                 | -1.903E-7               | 100.00                   | 833.33                   |
| <b>350 °C</b> | 100                | 1.332E-7                 | 1.187E-6                 | -2.260E-7               | 27.55                    | 769.23                   |
|               | 250                | 1.219E-7                 | 2.294E-6                 | -2.464E-7               | 34.32                    | 344.82                   |
|               | 500                | 1.234E-7                 | 4.971E-6                 | -1.432E-8               | 39.97                    | 112.36                   |
|               | 1000               | 1.244E-7                 | 1.099E-5                 | -3.680E-7               | 70.17                    | 344.82                   |
